# Supplementary material
Source: Springer Nature journal article supplement (https://www.springermedizin.de/resource/supplementary/12885_2010_2216_MOESM1_ESM.pdf/9460782)

## (A) Experimental set-up

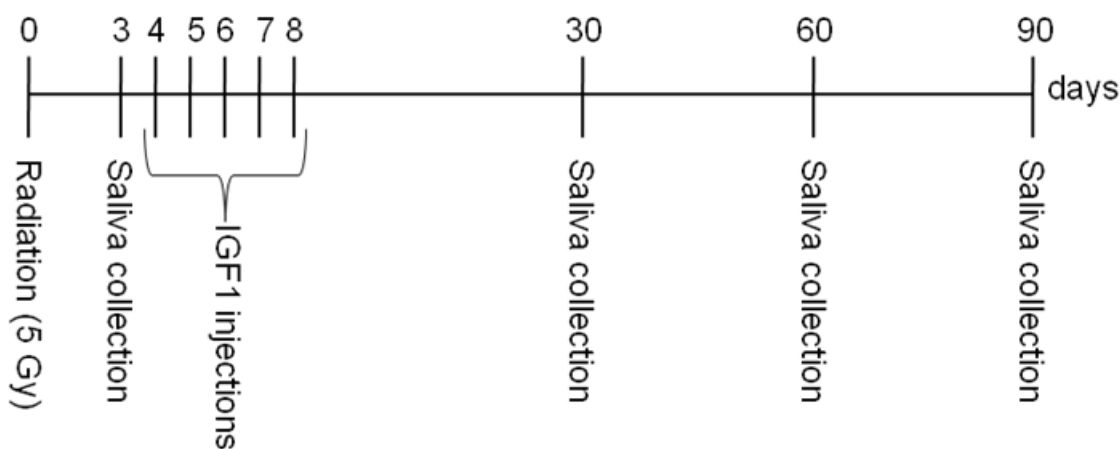

Tissue has been collected for histology on days 9, 30, 60, and 90

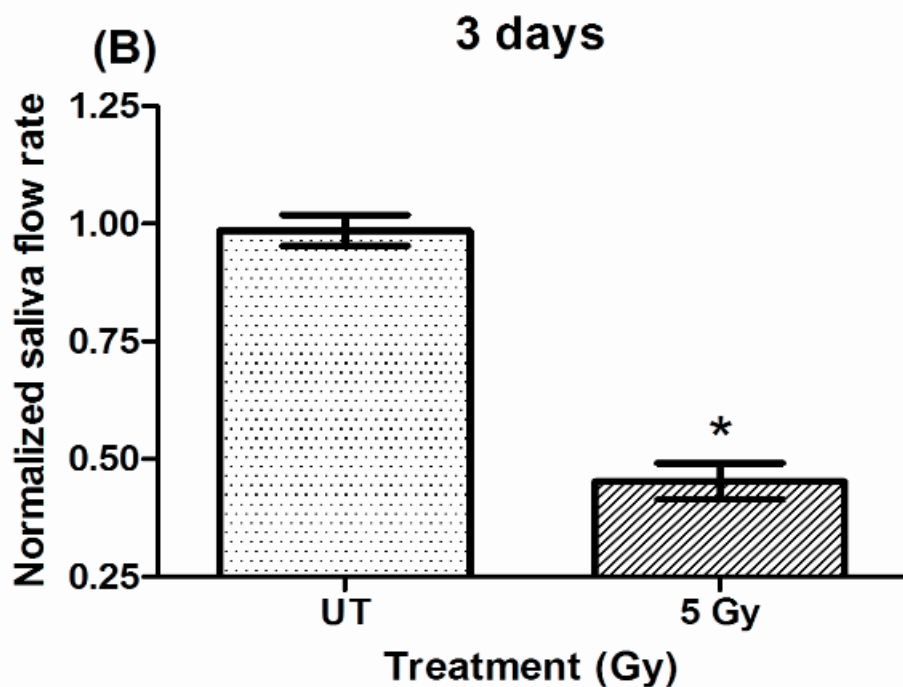

Supplement: MOESM1 [file 9460782]
